# Supplementary material
Source: publisher figshare collection journal article supplement (https://future-science-group.figshare.com/ndownloader/files/34507730)
Supplement: Supplementary file 1 [file 34507730]

**Quinazoline-based analogue of adenine as an antiDOTe against MLLr cells: synthesis, inhibition assays and docking studies**

Supplementary Information

**Virtual screening**

1. **Ligand based virtual screening (LB-VS) protocol**

Ligand-based virtual screening (LB-VS) represents a valuable tool for reducing the size of (virtual) compounds library and for selecting candidates for further synthesis and biological evaluation. In LB-VS group of compounds with unknown activity (test compounds) are chemically compared to an active compound against the desired target. This active compound is referred as template compound. Depending on the software, the template’s descriptors are calculated and compared with descriptors of the tested compounds. All the compounds are then scored and ranked according to the calculated properties of test compounds[1]. FLAP software (version 2.2.1) calculates Molecular Interaction Fields (MIFs) using small molecule probes which represent hydrophobic, shape and hydrogen bond acceptor and donor interactions. The MIFs were condensed into discrete hotspots describing the most favourable interaction locations. The combinations of these discrete hotspots produce 4-point pharmacophores. FLAP also generates by default 25 conformers of each tested compound and searches for the best conformer matches between template and tested compound.

In order to pre-filter initial database of 312 *in silico* designed compounds, LB-VS approach, implemented in FLAP software, has been used. For this LB-VS approach, we extracted a subset of 39 inhibitors against DOT1L from ChEMBL database (<https://www.ebi.ac.uk/chembl/>), which inhibitory constant was Ki ≤ 6500 nM, whereas 29 compounds with Ki ≥ 7800 nM against DOT1L, obtained from ChEMBL database, were considered inactive. Also, we generated 1373 decoys by using A Database of Useful Decoys (DUD-E, <http://dude.docking.org/>). These compounds have been used in validation of LB-VS procedure. Finally, we added the 312 *in silico* designed compounds in the data set for activity prediction.

Compound A7 (Dia-2[2]) (Figure 1 and Supplementary Table 1) from *in silico* designed dataset possess inhibitory activity against DOT1L with IC50=20 nM. We used this compound as a template for virtual screening, in order to identify compounds with similar pharmacophoric properties as A7 compound. To evaluate the screening results we used ROC curves and ranked compounds according to the highest AUC value (area under ROC curve) describing specific descriptor.

The best AUC value was calculated when we considered N1 descriptor (which describes hydrogen bond donor feature). The AUC value was 0.98, which defines a good discriminatory property of the developed LB-VS model between inactive and active DOT1L inhibitors. The ROC curve for ligand based virtual screening on the DOT1L ChEMBL dataset is presented in **Figure S1.**

**Table S1.** *Enrichment percentages*

| **Parameter** | **AUC** | **0.5%** | **1%** | **2%** | **5%** |
| --- | --- | --- | --- | --- | --- |
| N1 | 0.98 | 0.08 | 0.10 | 0.72 | 1.00 |


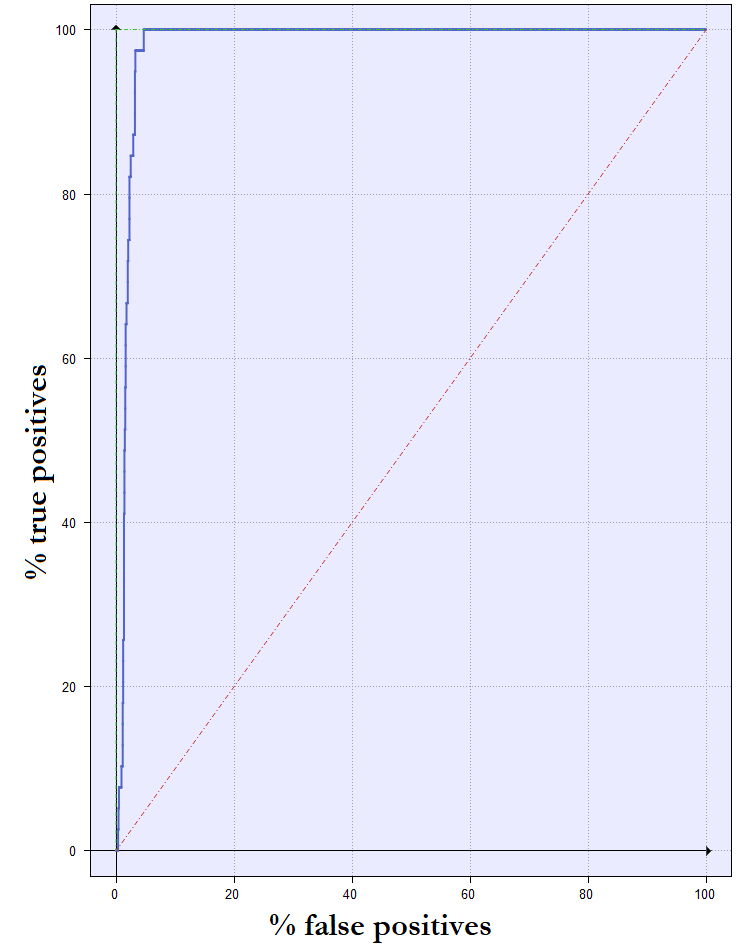


**Figure S1.** *ROC curve (depicted in blue) for ligand-based virtual screening on the DOT1L ChEMBL dataset*

The “early enrichment” phenomenon is an argument against using only AUC values, therefore we presented enrichment percentages (**Table S1**) at the following false positive values (X axis): 0.5%, 1%, 2% and 5% [3]. As can be observed from **Figure S1** and **Table S1** the percentage of the true positive (active) compounds in the virtual dataset increases up to 100% at 5% of false positive rate. We therefore decided to extract the first 5% of compounds from the virtual library, ranked according to N1 probe and subjected them to the molecular docking study. The list of the best ranked compounds (HIT compounds) in the top 5% molecules with their scores are presented in **Table S2**.

1. **Molecular docking study of selected HIT molecules as potential DOT1L inhibitors**

To examine the binding modes and rank the hit compounds according to their affinity to DOT1L, we performed molecular docking study in GOLD 5.5.0 Software[4]. The crystal structure of DOT1L enzyme (PDB: [4ER3](https://www.rcsb.org/pdb/explore/explore.do?structureId=4er3)) in complex with inhibitor EPZ4777 was used for the molecular docking study, whereas Discovery studio Visualizer v16.1.0 was used for visualization of the interactions between hit molecules and DOT1L.

To prepare a valid set-up for correct prediction of pose and orientation of the selected hit molecules, we first prepared different settings and investigated which one had satisfactory reproducibility. The main aim of preliminary docking study is defining setup which is able to reproduce the binding mode and orientation of co-crystal ligand in the active pocket of the examined enzyme. The parameter that is used for this type of validation is RMSD (root mean square deviation of atomic position). It is described in the literature that valid molecular docking setup is achieved when RMSD value is < 2Ǻ [5]. The binding pocket was defined according to the atomic coordinates of the co-crystal ligand EPZ4777 (all the atoms around co-crystal ligand in diameter of 6Ǻ were considered for potential interactions). We enabled for the co-crystal ligand and the selected hit molecules to rotate around flexible bonds. After several settings, we concluded that SAH derivatives with the bulky tert-butyl-phenyl group were not able to anchor in the pocket important for SAH recognition. Some of the active compounds downloaded from ChEMBL database were not correctly positioned in the allosteric pocket. Therefore, we decided to make some of the closest amino acid residues flexible, in order to investigate their role in opening the active pocket. The residue we found that has the most prominent effect on the opening the active pocket is Phe245. This phenylalanine behaves like a gatekeeper in the middle of the active pocket, enabling bulkier groups to reach the hydrophobic sub-pocket. The final calculations were based on the Gold Score as a scoring function.

The co-crystal ligand EPZ4777from crystal structureof DOT1L was re-docked in theactive pocket of examined enzyme and RMSD value was calculated. The GOLD software calculated this value equal to 0.6117 Ǻ, which is considered as valid docking setup for further testing of ligands. The presentation of co-crystal and re-docked structure of EPZ-4777 is shown on **Figure S2**. From these results we can conclude that the re-docked ligand made the same interactions with the amino acid residues in the co-factor pocket of DOT1L as the co-crystallised ligand.


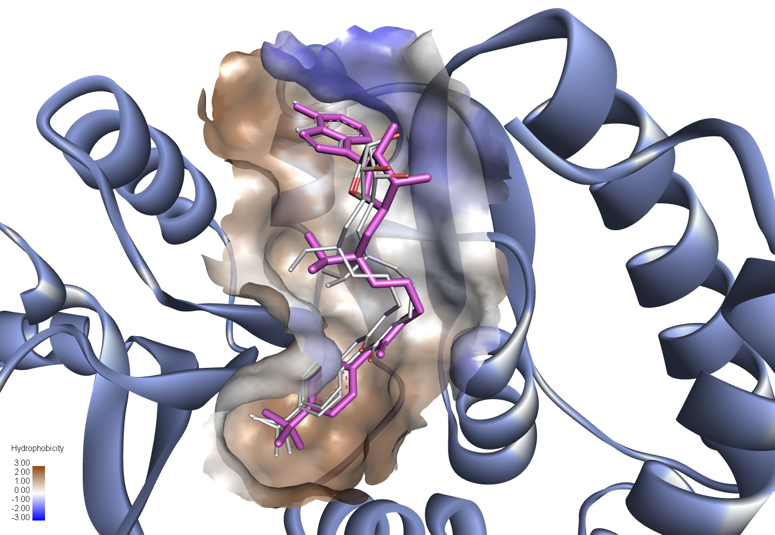

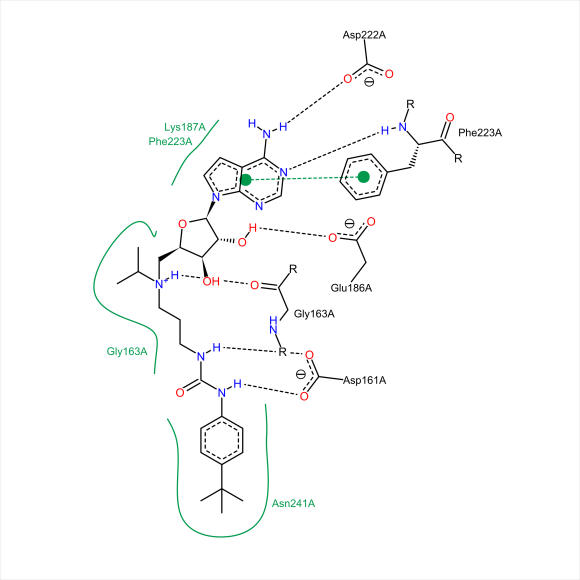


**Figure S2**. *Presentation of co-crystal ligand EPZ4777 (magenta) and best three re-docked ligands in the active pocket of DOT1L (left) and important amino acid residues included in interaction with co-crystal ligand (right)*

Having validated the setup of the molecular docking, we studied the selected hit molecules. These hit molecules represent dataset consisted of 87 compounds (**Table S2** and general formula in **Figure S3**). Top ranked poses with calculated GoldScore are presented in **Table S3.** Most of the top ranked molecules were successful in achieving the same interactions with DOT1L reported for EPZ00477. Nevertheless, orientation of isopropyl group was different in the most of top ranked poses, reaching out of the active pocket.

**Figure S3.** General formula of compounds for ligand based virtual screening campaign. Red is the part mimicking the second substrate, blue is the sugar analogue et green the adenine analogue. Named compounds A to W in Tables S1 and S2.

**Table S2**. Selected HIT compounds after ligand based virtual screening campaign. Compounds are from the CHEMBL database (<https://www.ebi.ac.uk/chembl/>) or were designed according to the general formula in Figure S1 (A to W compounds).

| **Candidate** | **Active** | **Distance_1** | **N1 (1)** | **Glob-Prod (1)** | **Glob-Sum (1)** |
| --- | --- | --- | --- | --- | --- |
| CHEMBL2170972 | 0 | 12.1802 | 0.476904 | 0.446348 | 1.30776 |
| A12.mol | 2 | 12.0546 | 0.458375 | 0.447748 | 1.3665 |
| CHEMBL2171184 | 0 | 12.0248 | 0.458 | 0.463534 | 1.38119 |
| CHEMBL2170990 | 0 | 12.003 | 0.455581 | 0.467066 | 1.30725 |
| CHEMBL2170974 | 0 | 12.6664 | 0.436915 | 0.425793 | 1.24528 |
| A8.mol | 2 | 11.7122 | 0.436606 | 0.452863 | 1.3117 |
| CHEMBL2170976 | 0 | 12.4024 | 0.435406 | 0.404591 | 1.10073 |
| CHEMBL2171182 | 1 | 12.7582 | 0.432674 | 0.417784 | 1.19878 |
| CHEMBL2171173 | 0 | 12.3526 | 0.42511 | 0.451459 | 1.30331 |
| CHEMBL3087502 | 1 | 11.8453 | 0.422626 | 0.473239 | 1.36544 |
| W7.mol | 2 | 12.5035 | 0.419922 | 0.413959 | 1.19681 |
| CHEMBL2171183 | 0 | 12.4497 | 0.411094 | 0.448327 | 1.2988 |
| A2.mol | 2 | 12.3989 | 0.410724 | 0.446932 | 1.27687 |
| A4.mol | 2 | 12.0283 | 0.410545 | 0.469305 | 1.34574 |
| CHEMBL3087500 | 1 | 11.0465 | 0.403201 | 0.542759 | 1.57997 |
| S7.mol | 2 | 11.7657 | 0.400807 | 0.43655 | 1.22607 |
| CHEMBL472733 | 0 | 12.5634 | 0.400463 | 0.437438 | 1.27151 |
| B8.mol | 2 | 12.6174 | 0.398588 | 0.386917 | 1.094 |
| C30H43N8O3 | 0 | 12.777 | 0.398461 | 0.388869 | 1.09798 |
| C20H31N7O4S | 0 | 12.847 | 0.393703 | 0.397656 | 1.11453 |
| T8.mol | 2 | 12.7796 | 0.392372 | 0.382028 | 1.0804 |
| CHEMBL191917 | 0 | 12.5282 | 0.389748 | 0.441731 | 1.25265 |
| C30H43N8O3 | 0 | 12.5647 | 0.389344 | 0.396659 | 1.09275 |
| E8.mol | 2 | 13.3384 | 0.38466 | 0.335266 | 0.906722 |
| CHEMBL399890 | 0 | 12.3355 | 0.383532 | 0.460113 | 1.30991 |
| CHEMBL3087504 | 1 | 12.1585 | 0.378679 | 0.423847 | 1.13683 |
| C20H25N7O4S | 0 | 12.0449 | 0.377236 | 0.449927 | 1.23029 |
| J11.mol | 2 | 12.2472 | 0.375418 | 0.455999 | 1.28801 |
| M8.mol | 2 | 11.9314 | 0.374429 | 0.458101 | 1.25385 |
| S8.mol | 2 | 12.8756 | 0.3706 | 0.385367 | 1.09485 |
| CHEMBL3087501 | 0 | 12.5548 | 0.369348 | 0.379755 | 1.09177 |
| C28H41N8O3 | 0 | 12.3018 | 0.368117 | 0.430964 | 1.16235 |
| B11.mol | 2 | 12.6873 | 0.364388 | 0.42644 | 1.25455 |
| L12.mol | 2 | 13.0549 | 0.363952 | 0.392854 | 1.07465 |
| C12.mol | 2 | 12.662 | 0.361906 | 0.404641 | 1.13091 |
| R12.mol | 2 | 12.681 | 0.360233 | 0.395084 | 1.08814 |
| A6.mol | 2 | 12.6574 | 0.360144 | 0.423338 | 1.17845 |
| B12.mol | 2 | 12.6588 | 0.358978 | 0.432169 | 1.19356 |
| CHEMBL2171181 | 1 | 12.9838 | 0.358351 | 0.388493 | 1.08849 |
| CHEMBL2171175 | 1 | 12.85 | 0.357762 | 0.413702 | 1.14281 |
| CHEMBL2171174 | 1 | 12.6379 | 0.356828 | 0.434286 | 1.17911 |
| R7.mol | 2 | 12.0632 | 0.356081 | 0.431249 | 1.15484 |
| I12.mol | 2 | 12.812 | 0.355783 | 0.397754 | 1.12311 |
| M7.mol | 2 | 12.2253 | 0.353131 | 0.435221 | 1.24494 |
| D11.mol | 2 | 12.7089 | 0.351661 | 0.43206 | 1.20449 |
| A7.mol | 2 | 12.7212 | 0.350803 | 0.384085 | 1.07975 |
| M10.mol | 2 | 12.5135 | 0.350093 | 0.443719 | 1.25907 |
| CHEMBL3087636 | 0 | 12.1397 | 0.34937 | 0.464591 | 1.35574 |
| A1.mol | 2 | 13.2945 | 0.349362 | 0.39099 | 1.08215 |
| CHEMBL2171178 | 1 | 12.9911 | 0.348193 | 0.405706 | 1.11785 |
| E7.mol | 2 | 12.875 | 0.347961 | 0.373314 | 1.05428 |
| N12.mol | 2 | 13.1376 | 0.346822 | 0.363919 | 0.976475 |
| N7.mol | 2 | 12.1319 | 0.346696 | 0.431195 | 1.23227 |
| CHEMBL2171171 | 1 | 12.8862 | 0.346657 | 0.411294 | 1.08387 |
| CHEMBL2170989 | 1 | 12.6806 | 0.346542 | 0.410765 | 1.09645 |
| CHEMBL193561 | 0 | 13.1221 | 0.345901 | 0.392725 | 1.06464 |
| N8.mol | 2 | 12.2998 | 0.345344 | 0.435008 | 1.17642 |
| C11.mol | 2 | 12.6164 | 0.344017 | 0.418785 | 1.15975 |
| CHEMBL2170984 | 0 | 13.1169 | 0.34315 | 0.370278 | 0.982738 |
| CHEMBL2171172 | 1 | 12.821 | 0.342521 | 0.393467 | 1.01848 |
| CHEMBL2171176 | 1 | 12.9927 | 0.340237 | 0.408094 | 1.10706 |
| D7.mol | 2 | 12.7419 | 0.340212 | 0.38231 | 1.07909 |
| CHEMBL2170986 | 1 | 12.7473 | 0.339783 | 0.43252 | 1.19466 |
| CHEMBL2170995 | 1 | 12.8133 | 0.339712 | 0.400694 | 1.05991 |
| CHEMBL3087503 | 1 | 12.5191 | 0.337825 | 0.387354 | 1.0718 |
| J10.mol | 2 | 12.99 | 0.337137 | 0.410155 | 1.11894 |
| E11.mol | 2 | 13.2537 | 0.335703 | 0.361855 | 1.01675 |
| CHEMBL2171002 | 1 | 12.3294 | 0.335514 | 0.443876 | 1.20876 |
| CHEMBL3087639 | 0 | 12.9621 | 0.333702 | 0.426566 | 1.16808 |
| E10.mol | 2 | 13.1938 | 0.333678 | 0.364074 | 1.00379 |
| CHEMBL2171180 | 1 | 12.9055 | 0.332823 | 0.417981 | 1.15412 |
| J2.mol | 2 | 12.8776 | 0.33252 | 0.410511 | 1.11898 |
| CHEMBL2169919 | 1 | 12.7549 | 0.33199 | 0.410994 | 1.16775 |
| CHEMBL2170988 | 1 | 12.9657 | 0.331812 | 0.399968 | 1.0459 |
| Q7.mol | 2 | 12.0698 | 0.331325 | 0.450937 | 1.26626 |
| T11.mol | 2 | 12.3714 | 0.330321 | 0.443482 | 1.28922 |
| CHEMBL2170973 | 0 | 13.2563 | 0.329807 | 0.376868 | 0.98691 |
| M5.mol | 2 | 12.534 | 0.328794 | 0.446421 | 1.22257 |
| CHEMBL2170999 | 1 | 13.1493 | 0.328206 | 0.379942 | 0.990757 |
| C28H43N8O3 | 0 | 13.137 | 0.328063 | 0.3613 | 0.986621 |
| A11.mol | 2 | 12.7623 | 0.327303 | 0.428102 | 1.15924 |
| CHEMBL3414626 | 1 | 13.3144 | 0.326247 | 0.336593 | 0.906978 |
| D4.mol | 2 | 12.5809 | 0.326159 | 0.439462 | 1.2116 |
| CHEMBL2171000 | 1 | 13.0736 | 0.325466 | 0.407603 | 1.0801 |
| CHEMBL2170983 | 0 | 12.4436 | 0.32447 | 0.453162 | 1.21962 |
| CHEMBL2171169 | 1 | 12.8327 | 0.323858 | 0.391042 | 1.04316 |
| A10.mol | 2 | 13.236 | 0.323473 | 0.393419 | 1.05151 |
| L11.mol | 2 | 12.8073 | 0.322797 | 0.41893 | 1.14513 |

**Table S3**. Ranked compounds after molecular docking results. Active (Ki≤6500nM) and inactive (Ki≥7800nM) compounds selected from CHEMBL database are coloured in blue and yellow respectively.

| **Rank** | **Compound** | **GoldScore** |
| --- | --- | --- |
| 1 | EPZ4777 (co-crystal ligand) | 101.776 |
| 2 | CHEMBL3087501 | 99.3004 |
| 3 | C28H41N8O3 | 97.8758 |
| 4 | A7/Dia2 | 97.0547 |
| 5 | CHEMBL3414626 | 95.4618 |
| 6 | CHEMBL2171171 | 93.9249 |
| 7 | C28H43N8O3 | 93.3172 |
| 8 | W7 | 93.2473 |
| 9 | A8/Dia1 | 92.5456 |
| 10 | CHEMBL2171169 | 91.6689 |
| 11 | T8 | 90.7238 |
| 12 | M8 | 89.4044 |
| 13 | CHEMBL2169919 | 89.0895 |
| 14 | S8 | 86.6956 |
| 15 | CHEMBL3087500 | 86.0234 |
| 16 | R7 | 85.8917 |
| 17 | CHEMBL3087504 | 85.7288 |
| 18 | B8 | 85.5452 |
| 19 | Q7 | 85.3845 |
| 20 | M7 | 85.1188 |
| 21 | S7 | 84.5543 |
| 22 | N7 | 84.3495 |
| 23 | E8 | 84.1356 |
| 24 | C30H43N8O3 | 83.0467 |
| 25 | C20H31N7O4S | 82.5723 |
| 26 | CHEMBL2171000 | 82.3121 |
| 27 | E7 | 82.2442 |
| 28 | N8 | 81.8913 |
| 29 | CHEMBL2170988 | 81.0371 |
| 30 | C20H25N7O4S | 80.9949 |
| 31 | CHEMBL3087503 | 80.5508 |
| 32 | CHEMBL3087636 | 80.4315 |
| 33 | D7 | 80.4282 |
| 34 | CHEMBL2170989 | 80.0821 |
| 35 | CHEMBL2170999 | 79.8676 |
| 36 | CHEMBL2170995 | 79.4619 |
| 37 | CHEMBL2170986 | 78.7876 |
| 38 | CHEMBL2171182 | 78.3072 |
| 39 | CHEMBL3087502 | 77.9675 |
| 40 | CHEMBL2171172 | 76.7166 |
| 41 | C30H43N8O3 | 75.826 |
| 42 | CHEMBL2170983 | 75.4115 |
| 43 | CHEMBL2171002 | 74.49 |
| 44 | CHEMBL2171180 | 74.2427 |
| 45 | CHEMBL2170976 | 74.0827 |
| 46 | E10 | 72.6805 |
| 47 | E11 | 72.6476 |
| 48 | CHEMBL2171181 | 71.2776 |
| 49 | CHEMBL2170984 | 71.0344 |
| 50 | CHEMBL2170990 | 70.9488 |
| 51 | CHEMBL2171176 | 69.7275 |
| 52 | CHEMBL2171174 | 67.8587 |
| 53 | CHEMBL2171175 | 66.9004 |
| 54 | CHEMBL2171178 | 66.6331 |
| 55 | A4 | 65.044 |
| 56 | L12 | 64.1718 |
| 57 | J12 | 63.3119 |
| 58 | CHEMBL2170973 | 63.1554 |
| 59 | N12 | 62.8238 |
| 60 | A6 | 62.5963 |
| 61 | A2 | 62.356 |
| 62 | A11 | 60.6185 |
| 63 | R12 | 60.5928 |
| 64 | C12 | 60.4312 |
| 65 | CHEMBL2170974 | 60.401 |
| 66 | D11 | 60.3319 |
| 67 | CHEMBL3087639 | 59.86 |
| 68 | B11 | 59.796 |
| 69 | CHEMBL191917 | 59.6875 |
| 70 | A12 | 58.799 |
| 71 | J10 | 58.758 |
| 72 | I12 | 58.6417 |
| 73 | C11 | 58.6288 |
| 74 | T11 | 58.6052 |
| 75 | D4 | 58.5082 |
| 76 | B12 | 57.7654 |
| 77 | A10 | 57.5028 |
| 78 | CHEMBL2171183 | 56.9291 |
| 79 | CHEMBL2171173 | 56.3078 |
| 80 | CHEMBL399890 | 55.54 |
| 81 | CHEMBL2171184 | 55.1961 |
| 82 | CHEMBL2170972 | 55.1546 |
| 83 | CHEMBL193561 | 55.0372 |
| 84 | M10 | 54.5776 |
| 85 | J11 | 54.2575 |
| 86 | M5 | 52.5586 |
| 87 | CHEMBL472733 | 51.8023 |
| 88 | A1 | 49.6591 |

**Figure S4**. **Left.** Cellular growth of MV4-11 (MLL-AF4) followed up to 15 days upon treatment with 10 µM (dark blue curve), 3.2 µM (blue curve) and 1.0 µM (light blue curve) of EPZ5676. Viable cells were counted every 3 to 4 days in the presence of EPZ5676or DMSO (-) (black curve) and the ratio number of cells over initial population were plotted. **Right.** Theviability was evaluated every 3 to 4 days (dotted curves). Every data point are the results of technical duplicates..

.

**Gel 1
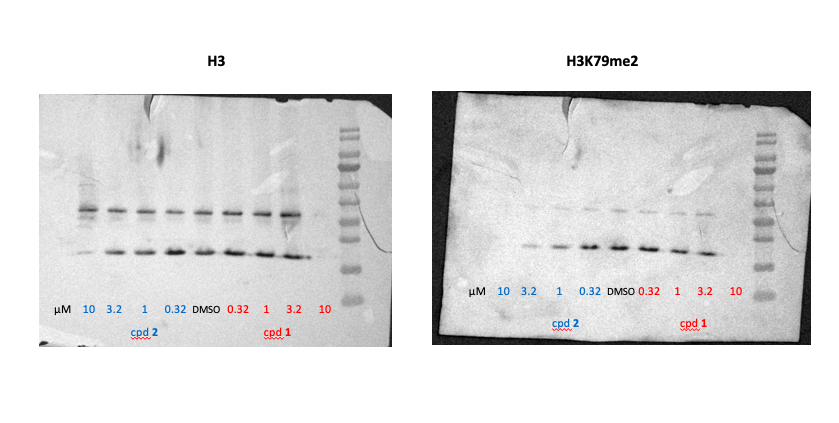
**

**Gel 2**

**
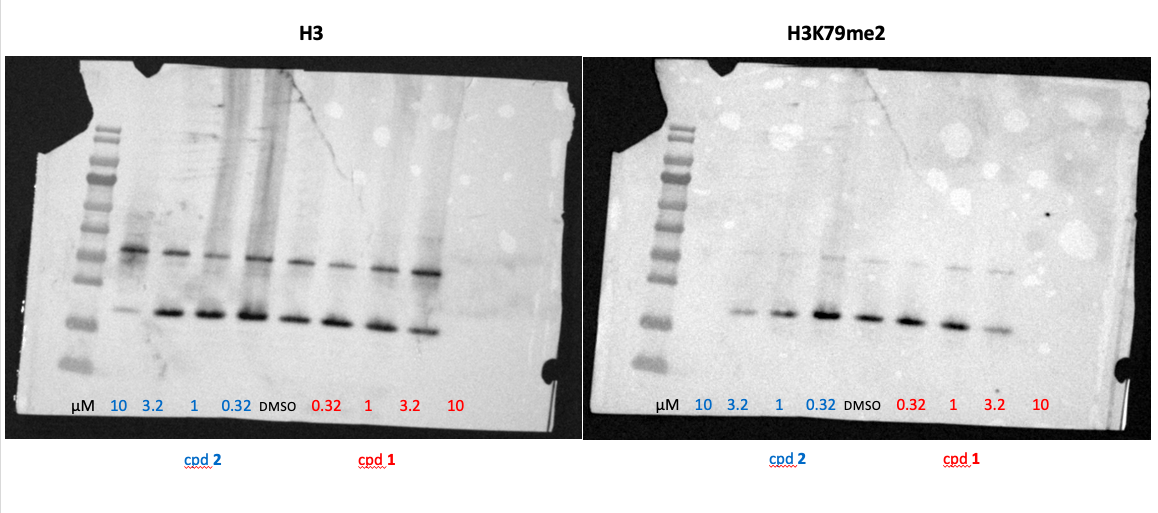
**

**Figure S5**. Full gels used for western blot analysis.


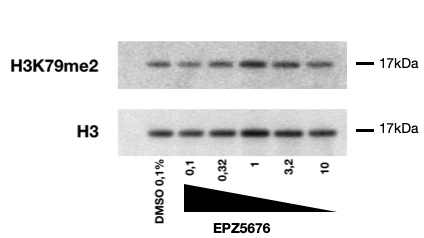

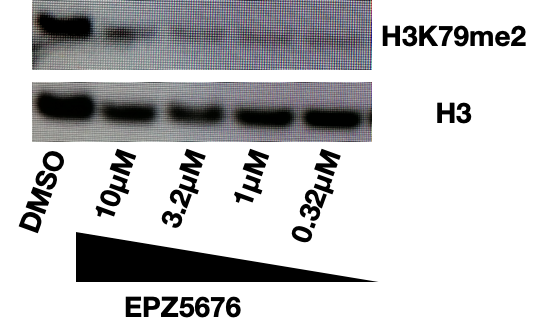


**Figure S6**. Two western blot analysis of the H3K79me2 and the H3 signal of harvested histones from MV4-11 cells after 6 days treatment at the indicated concentration of EPZ5676. 500 ng of proteins per well were analyzed.

***High content screening***

Human osteosarcoma U-2 OS cancer cell line (ATCC® HTB-96™) was purchased from American Type Culture Collection. Cells were cultured in Dulbecco's Modified Eagle Medium (GibcoTM ThermoFisher ScientificTM) supplemented with 10% Foetal Bovine Serum (FBS). Cells were maintained at a humidified atmosphere at 37°C and 5% CO2. Cells were re-seeded every second or third day. For the high content screening, 250 adherent U-2 OS cells per well in 96-well plate (Greiner 655090) in complete medium and treated with the compound 1 or 2 at final concentration of 1 µM and control cells treated with vehicle DMSO maintained at 0.1% final concentration. Cells were treated for 10 days replacing to the fresh media and compounds every second or third day. At day 10th of the treatment cells were fixed with 4% final concentration of paraformaldehyde (PFA) for 20min, an aldehyde groups were quenched with 50mM final concentration of NH4Cl for 5min, cell membrane was permeabilised with 0.2% final concentration of Triton X-100 for 10min with washing with PBS between each step. Cells were blocked with 1% BSA for 1h at RT and incubated with unconjugated primary antibody 1h at RT, washed twice with PBS, incubated with secondary antibody or incubated with primary conjugated antibody for 1h at RT. Cells were washed twice with PBS, nuclei were counterstained with DAPI (final concentration 3 mM) for 5min at RT, washed twice with PBS, added 200µL PBS. For each well, 16 images per channel were acquired with confocal microscope (Olympus IX). Images were analysed with Fiji ImageJ program[6] for the measurement of integrated fluorescence intensity. Values were normalised to DMSO treated cells and presented as arbitrary units (A.U.). For statistical power, at least 2000 cells per well were analysed[7].


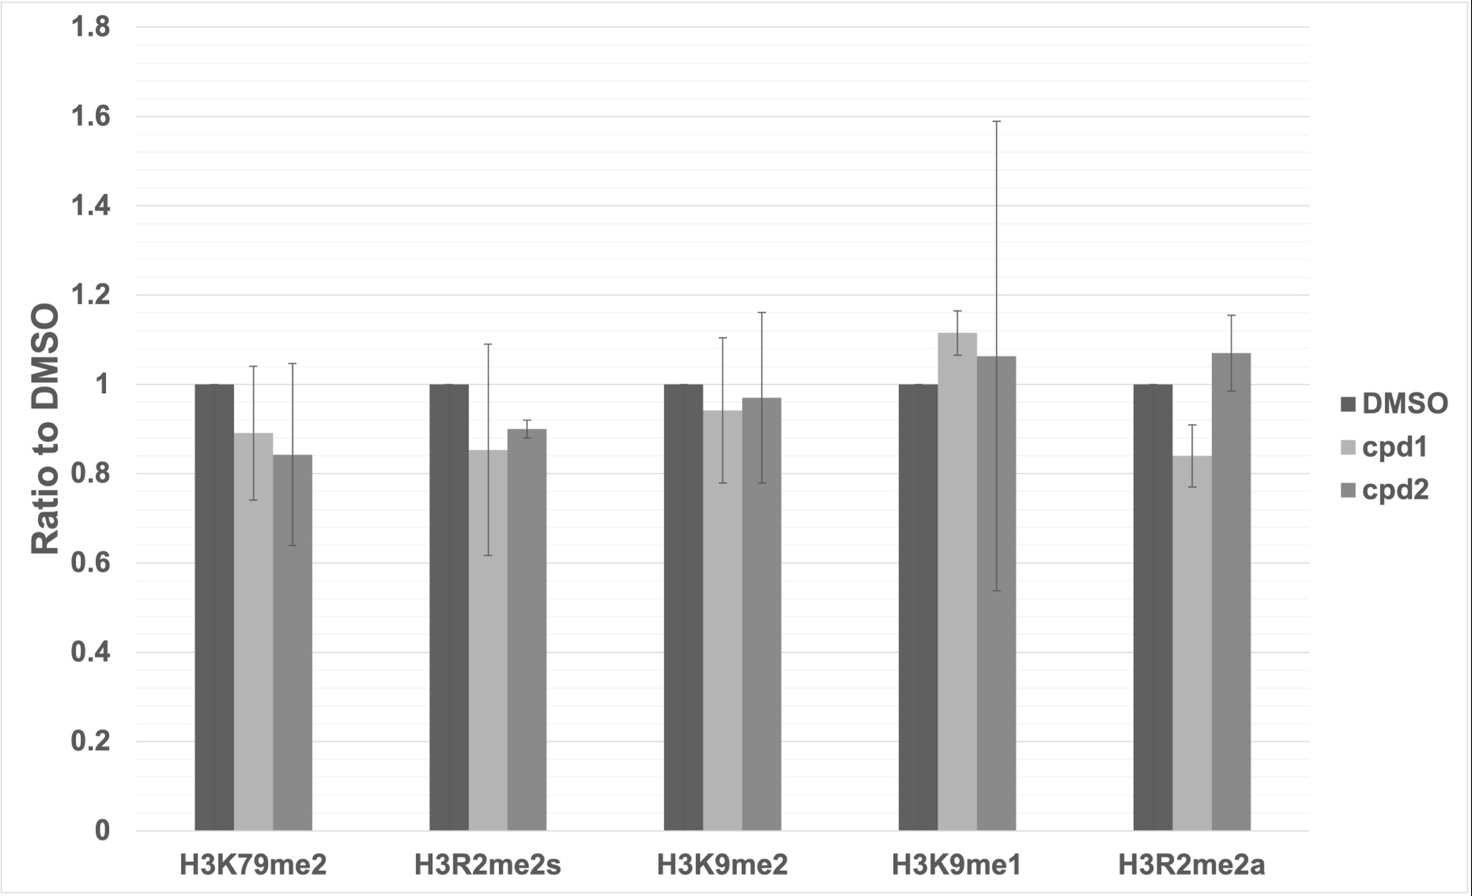


**Figure S7.** High content screening on the effect of the compound **1** (in light grey) and **(±)-2** (in dark grey) on the methylation of seven different histone marks in osteosarcoma cancer cells U20S. Cells were treated with the compounds at 1µM concentration for 10 days. Integrated fluorescence density was normalised to counted cells and presented as a relative ratio to DMSO treated cells showed in arbitrary units (A.U.).

**
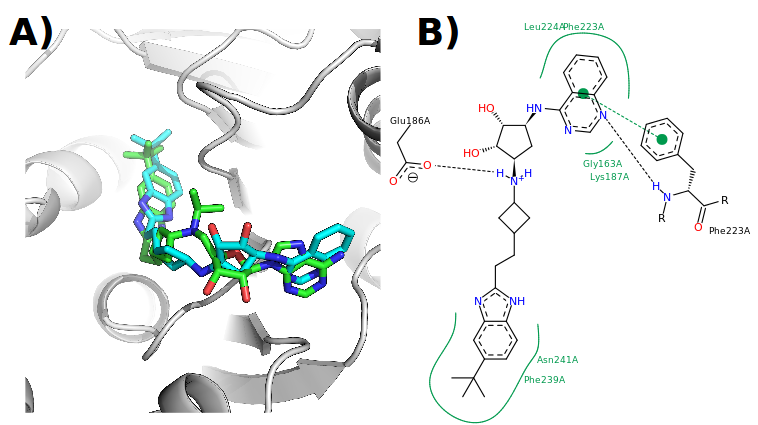
**

**Figure S8.** Predicted binding mode of enantiomer (3*R*,5*S,*3*S*,5*R*) of compound **2** obtained by molecular docking in the crystal structure of DOT1L with EPZ-5676 (PBD code: 4HRA). A) Comparison of the binding modes of EPZ-5676 (green sticks) and compound **2** (3*R*,5*S,*3*S*,5*R*) (cyan sticks) in the binding pocket of human DOT1L. B) 2D representation of intermolecular interactions predicted for compound **2** (3*R*,5*S,*3*S*,5*R*).

**References**

1. Sun Y, Zhou H, Zhu H, Leung S. Ligand-based virtual screening and inductive learning for identification of SIRT1 inhibitors in natural products. *Sci. Rep.* 6(1), 19312 (2016).

2. Bon C, Si Y, Pernak M, *et al.* Synthesis and Biological Activity of a Cytostatic Inhibitor of MLLr Leukemia Targeting the DOT1L Protein. *Molecules*. 26(17), 5300 (2021).

3. Jain AN, Nicholls A. Recommendations for evaluation of computational methods. *J. Comput. Aided Mol. Des.* 22(3–4), 133–139 (2008).

4. GOLD - Protein Ligand Docking Software ​ ​- The Cambridge Crystallographic Data Centre (CCDC) [Internet]. . Available from: https://www.ccdc.cam.ac.uk/solutions/csd-discovery/components/gold/.

5. Hevener KE, Zhao W, Ball DM, *et al.* Validation of Molecular Docking Programs for Virtual Screening against Dihydropteroate Synthase. *J. Chem. Inf. Model.* 49(2), 444–460 (2009).

6. Schindelin J, Arganda-Carreras I, Frise E, *et al.* Fiji - an Open Source platform for biological image analysis. *Nat. Methods* [Internet]. 9(7) (2012). Available from: https://www.ncbi.nlm.nih.gov/pmc/articles/PMC3855844/.

7. Si Y, Bon C, Cadet-Daniel V, *et al.* A novel screening strategy to identify histone methyltransferase inhibitors reveals a crosstalk between DOT1L and CARM1. (2021).

**Analytical characterisation of compounds 1 and 2**

**Cpd 1 - HPLC analysis**

**
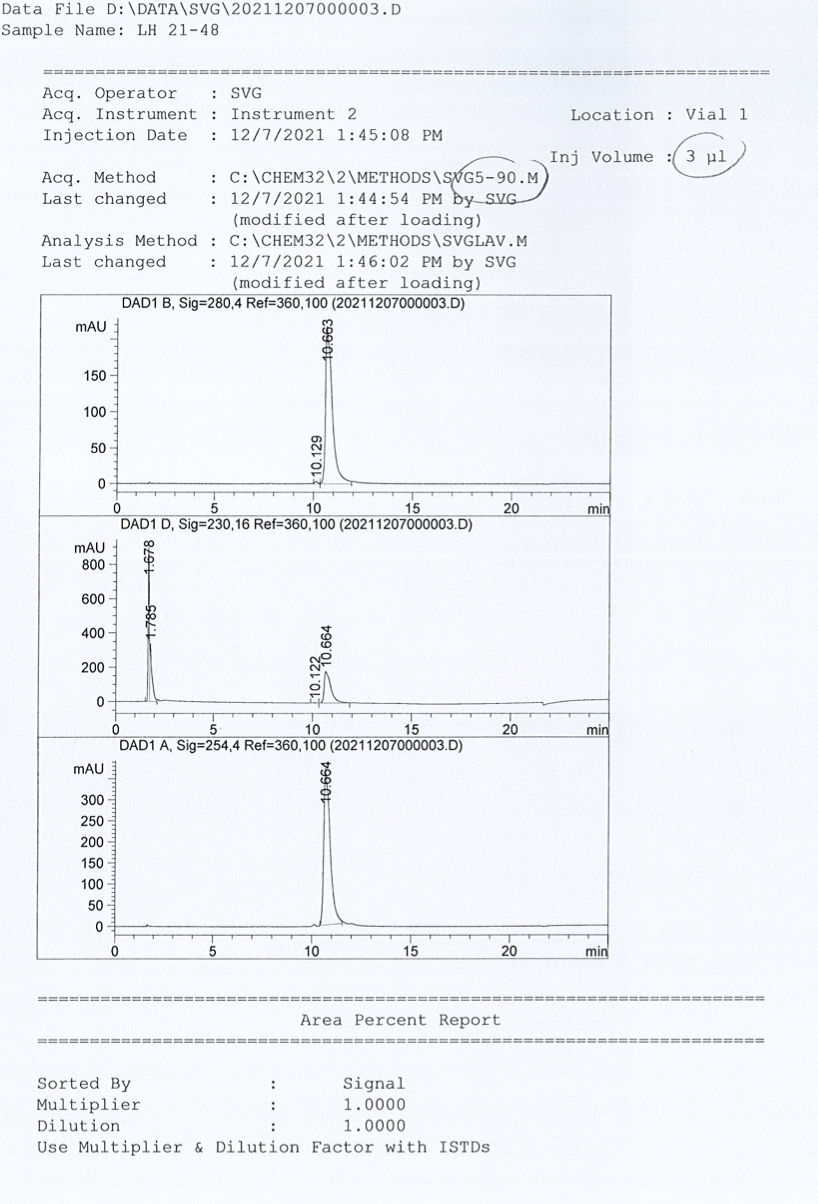
**

**
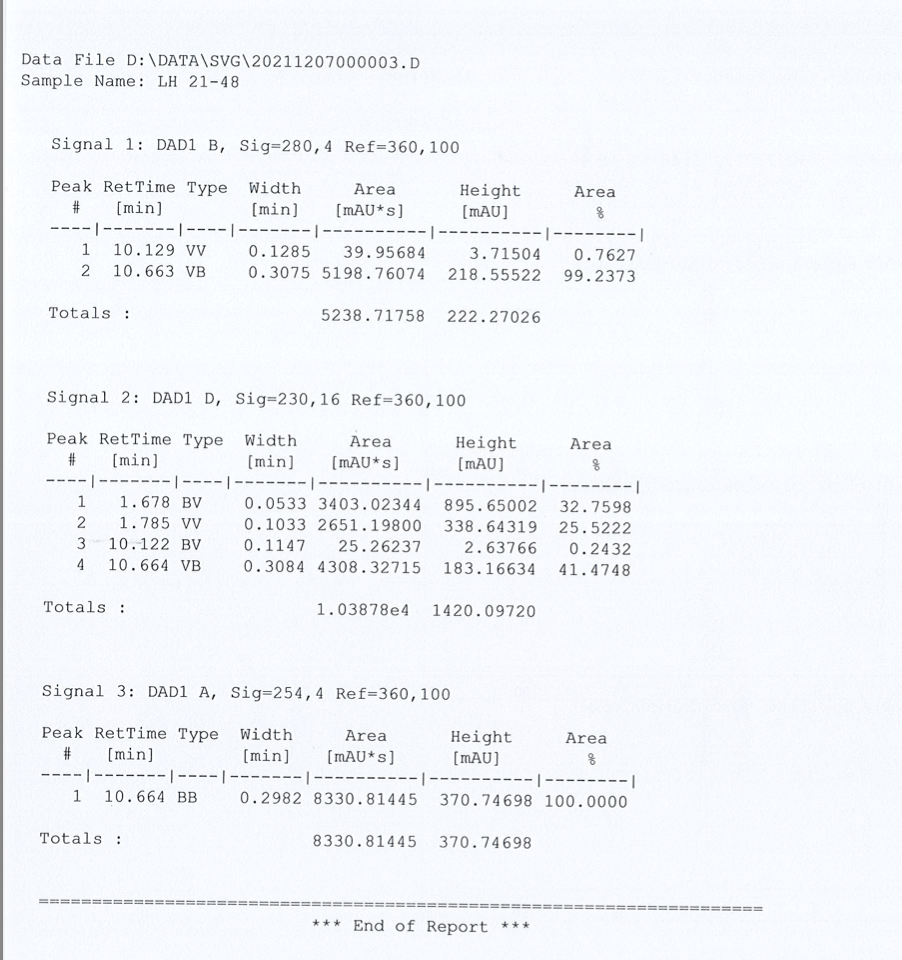
**

**1H NMR**

**13C NMR**

**Cpd 2 - HPLC analysis**

**
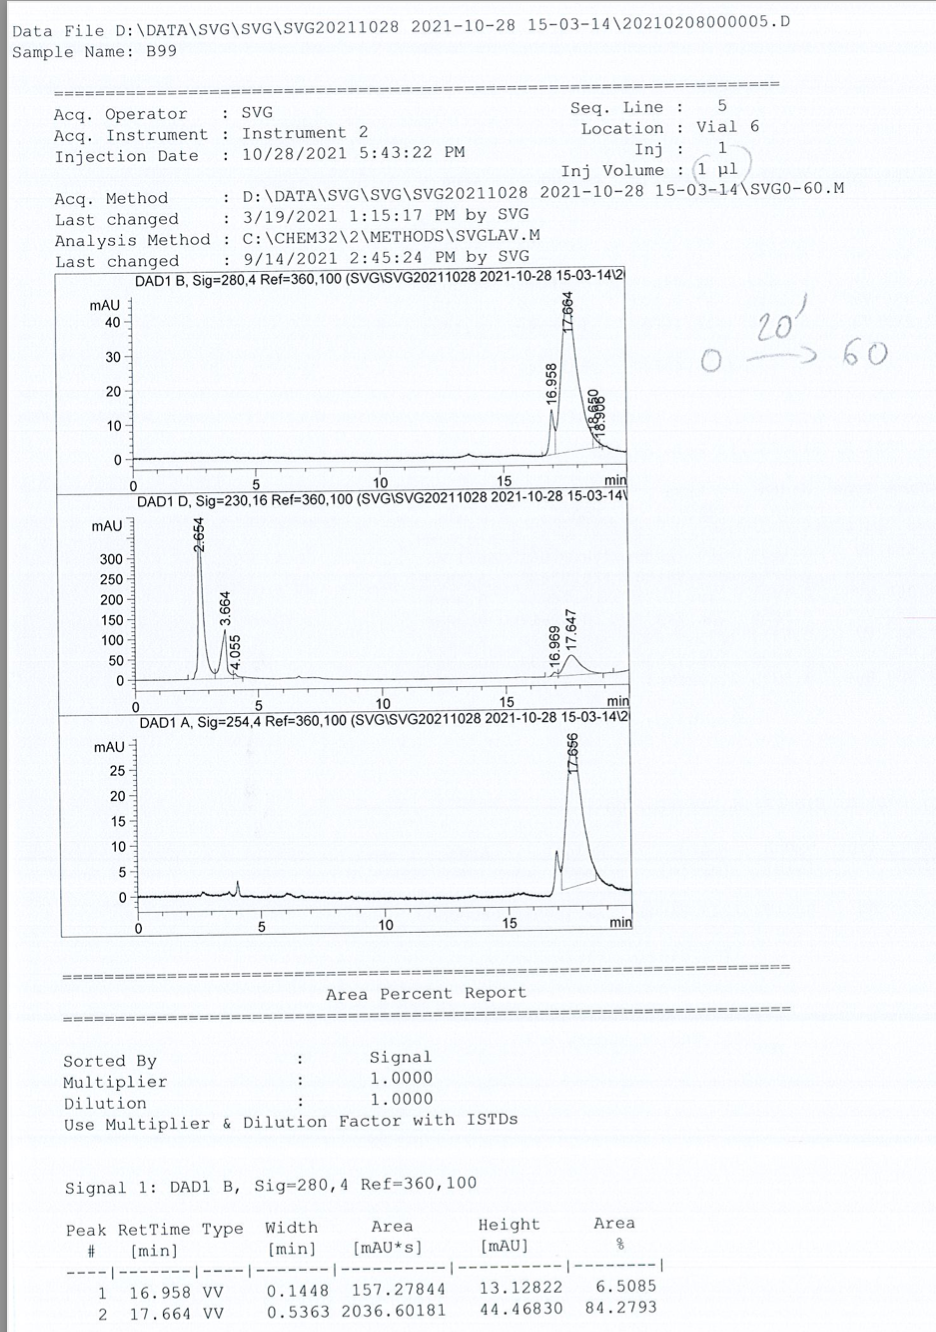
**

**
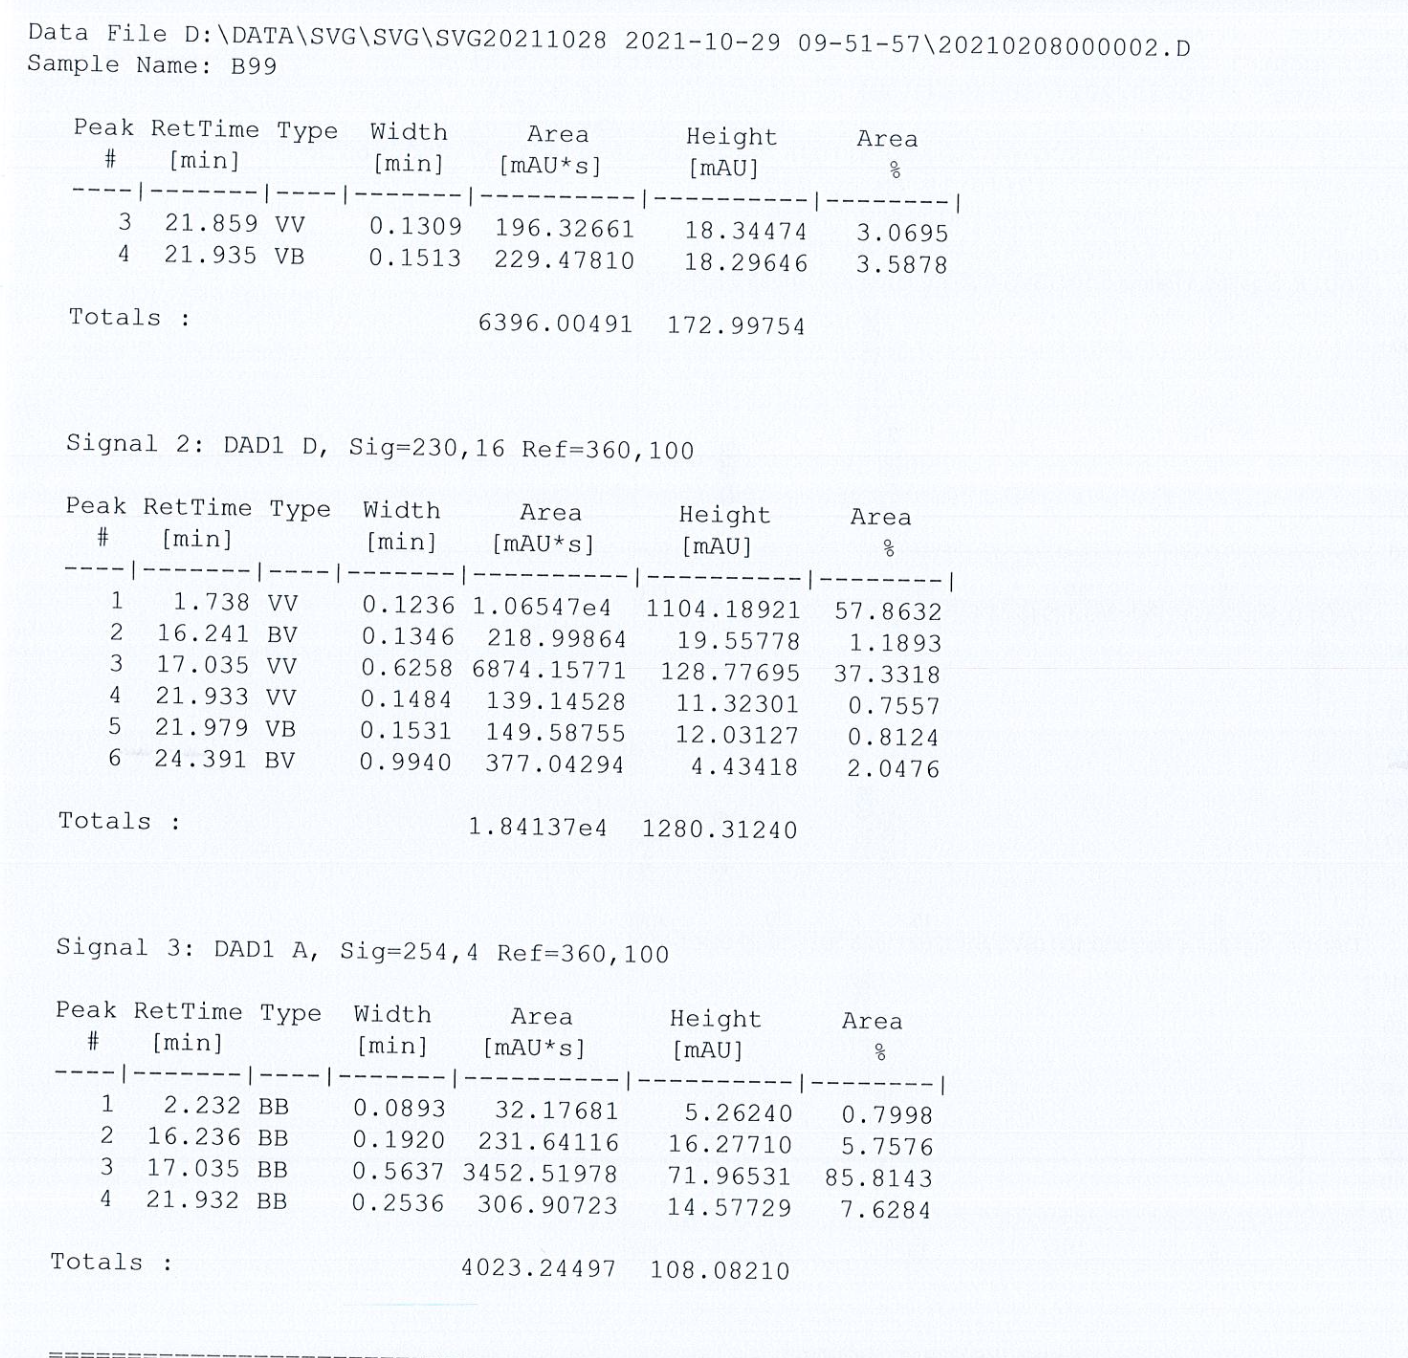
**

**1H NMR**

**13C NMR**
